# Supplementary material for: Mechanisms of thrombocytopenia in platelet-type von Willebrand disease
Source: PubMed Central journal article supplement — Haematologica. 2019 Jan 17;104(7):1473–81. doi: 10.3324/haematol.2018.200378 (PMC6601082; doi:10.3324/haematol.2018.200378), 2019-07
Supplement: 2018_200378-Disclosures_and_Contributions.pdf [file 2018_200378-Disclosures_and_Contributions.pdf]

Haematologica  
HAEMATOL/2018/200378  
Version 3  
Mechanisms of thrombocytopenia in platelet-type Von Willebrand  
Disease

Loredana Bury, Alessandro Malara, Stefania Momi, Eleonora Petito,  
Alessandra Balduini, and Paolo Gresele

Disclosures: The authors declare no conflicts of interest.

Contributions: LB, AM, SM and EP performed experiments, analyzed and interpreted data; AB and PG designed and supervised the study; PG contributed the patient for the study; LB and PG wrote the manuscript; PG and AB critically revised the manuscript.
