# Supplementary material for: Mechanisms of thrombocytopenia in platelet-type von Willebrand disease
Source: PubMed Central journal article supplement — Haematologica. 2019 Jan 17;104(7):1473–81. doi: 10.3324/haematol.2018.200378 (PMC6601082; doi:10.3324/haematol.2018.200378), 2019-07

# Insight in the mechanism of thrombocytopenia in platelet-type von Willebrand disease

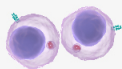

Megakaryocytes (MK) from platelet-type von Willebrand disease (PT-VWD) patients carrying the Met239Val mutation

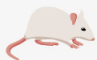

Mice expressing the human GPIb transgene carrying the Gly233Val variant in homozygous form

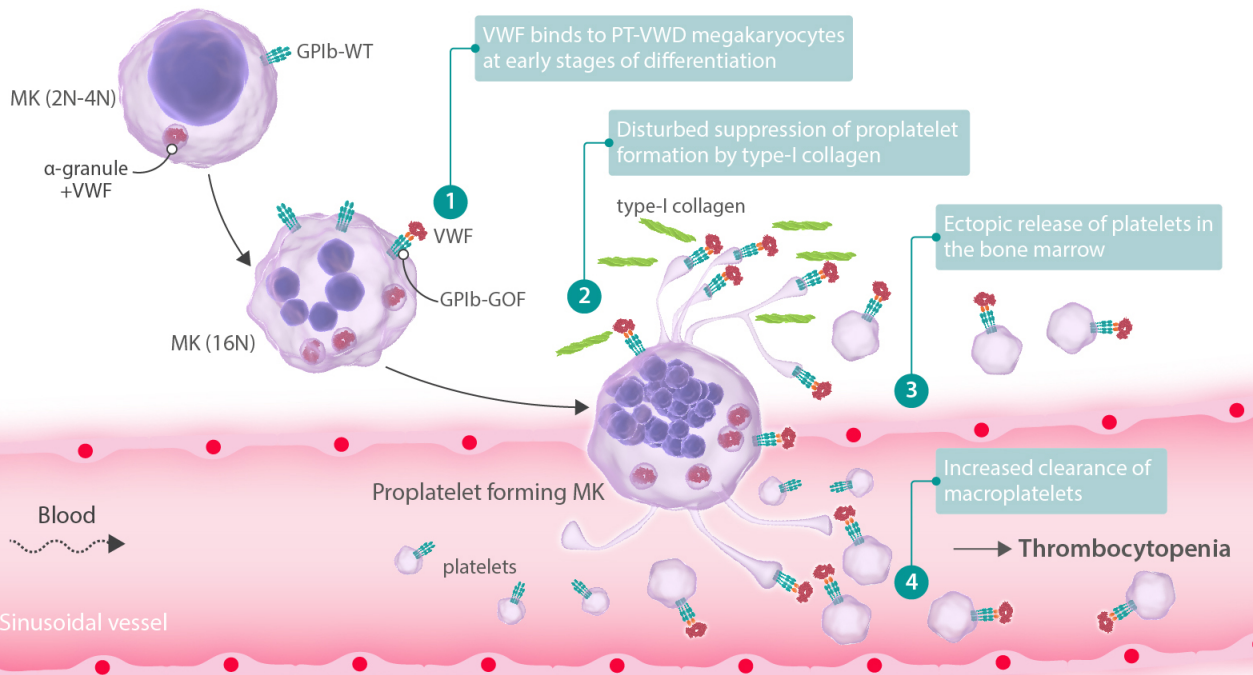

Supplement: HAEMATOL-2018-200378v3-Bury-01.pdf [file HAEMATOL-2018-200378v3-Bury-01.pdf]
